# Supplementary material
Source: publisher site journal article supplement (https://www.dovepress.com/article/305388)

**Supplementary Table 1. Differentially expressed genes in both sh-HIPPI-transfected H157 and A549 compared to WT cells.**

| **Entrez.Gene** | **Gene.Symbol** | **Regulation** |  | **Entrez.Gene** | **Gene.Symbol** | **Regulation** |
| --- | --- | --- | --- | --- | --- | --- |
| 23176 | 8-Sep | down |  | 19 | ABCA1 | up |
| 116236 | ABHD15 | down |  | 93 | ACVR2B | up |
| 10152 | ABI2 | down |  | 8038 | ADAM12 | up |
| 3983 | ABLIM1 | down |  | 135 | ADORA2A | up |
| 29 | ABR | down |  | 27161 | AGO2 | up |
| 36 | ACADSB | down |  | 192670 | AGO4 | up |
| 55860 | ACTR10 | down |  | 9590 | AKAP12 | up |
| 90 | ACVR1 | down |  | 272 | AMPD3 | up |
| 120 | ADD3 | down |  | 157567 | ANKRD46 | up |
| 55256 | ADI1 | down |  | 8542 | APOL1 | up |
| 55326 | AGPAT5 | down |  | 80830 | APOL6 | up |
| 207 | AKT1 | down |  | 374 | AREG | up |
| 64400 | AKTIP | down |  | 1820 | ARID3A | up |
| 284 | ANGPT1 | down |  | 10620 | ARID3B | up |
| 26057 | ANKRD17 | down |  | 10123 | ARL4C | up |
| 10947 | AP3M2 | down |  | 55207 | ARL8B | up |
| 324 | APC | down |  | 445 | ASS1 | up |
| 9716 | AQR | down |  | 467 | ATF3 | up |
| 55114 | ARHGAP17 | down |  | 84002 | B3GNT5 | up |
| 2909 | ARHGAP35 | down |  | 27113 | BBC3 | up |
| 57492 | ARID1B | down |  | 597 | BCL2A1 | up |
| 153642 | ARSK | down |  | 84707 | BEX2 | up |
| 25923 | ATL3 | down |  | 330 | BIRC3 | up |
| 23300 | ATMIN | down |  | 8548 | BLZF1 | up |
| 9551 | ATP5J2 | down |  | 25798 | BRI3 | up |
| 10632 | ATP5L | down |  | 10950 | BTG3 | up |
| 8992 | ATP6V0E1 | down |  | 10385 | BTN2A2 | up |
| 64756 | ATPAF1 | down |  | 11118 | BTN3A2 | up |
| 79000 | AUNIP | down |  | 387763 | C11orf96 | up |
| 6790 | AURKA | down |  | 84419 | C15orf48 | up |
| 135152 | B3GAT2 | down |  | 114897 | C1QTNF1 | up |
| 23621 | BACE1 | down |  | 25966 | C2CD2 | up |
| 572 | BAD | down |  | 79669 | C3orf52 | up |
| 580 | BARD1 | down |  | 56951 | C5orf15 | up |
| 9774 | BCLAF1 | down |  | 834 | CASP1 | up |
| 57673 | BEND3 | down |  | 837 | CASP4 | up |
| 221336 | BEND6 | down |  | 840 | CASP7 | up |
| 51283 | BFAR | down |  | 841 | CASP8 | up |
| 54841 | BIVM | down |  | 168455 | CCDC71L | up |
| 641 | BLM | down |  | 6364 | CCL20 | up |
| 79866 | BORA | down |  | 6352 | CCL5 | up |
| 10380 | BPNT1 | down |  | 29126 | CD274 | up |
| 672 | BRCA1 | down |  | 958 | CD40 | up |
| 140707 | BRI3BP | down |  | 1604 | CD55 | up |
| 55727 | BTBD7 | down |  | 9308 | CD83 | up |
| 91298 | C12orf29 | down |  | 55664 | CDC37L1 | up |
| 123207 | C15orf40 | down |  | 1027 | CDKN1B | up |
| 128061 | C1orf131 | down |  | 10658 | CELF1 | up |
| 54964 | C1orf56 | down |  | 57214 | CEMIP | up |
| 388969 | C2orf68 | down |  | 629 | CFB | up |
| 79034 | C7orf26 | down |  | 26511 | CHIC2 | up |
| 771 | CA12 | down |  | 50515 | CHST11 | up |
| 826 | CAPNS1 | down |  | 51363 | CHST15 | up |
| 4076 | CAPRIN1 | down |  | 9076 | CLDN1 | up |
| 59082 | CARD18 | down |  | 9069 | CLDN12 | up |
| 57082 | CASC5 | down |  | 123920 | CMTM3 | up |
| 8573 | CASK | down |  | 1267 | CNP | up |
| 839 | CASP6 | down |  | 80219 | COQ10B | up |
| 23468 | CBX5 | down |  | 22849 | CPEB3 | up |
| 91057 | CCDC34 | down |  | 9586 | CREB5 | up |
| 151887 | CCDC80 | down |  | 153222 | CREBRF | up |
| 79080 | CCDC86 | down |  | 1390 | CREM | up |
| 55704 | CCDC88A | down |  | 1437 | CSF2 | up |
| 898 | CCNE1 | down |  | 1440 | CSF3 | up |
| 151195 | CCNYL1 | down |  | 64651 | CSRNP1 | up |
| 54462 | CCSER2 | down |  | 8727 | CTNNAL1 | up |
| 22948 | CCT5 | down |  | 1514 | CTSL | up |
| 8317 | CDC7 | down |  | 1525 | CXADR | up |
| 83879 | CDCA7 | down |  | 2919 | CXCL1 | up |
| 55536 | CDCA7L | down |  | 2920 | CXCL2 | up |
| 5127 | CDK16 | down |  | 2921 | CXCL3 | up |
| 23097 | CDK19 | down |  | 3576 | CXCL8 | up |
| 1031 | CDKN2C | down |  | 84418 | CYSTM1 | up |
| 1033 | CDKN3 | down |  | 1613 | DAPK3 | up |
| 1039 | CDR2 | down |  | 167227 | DCP2 | up |
| 1058 | CENPA | down |  | 23586 | DDX58 | up |
| 79019 | CENPM | down |  | 22898 | DENND3 | up |
| 79682 | CENPU | down |  | 55332 | DRAM1 | up |
| 201161 | CENPV | down |  | 29940 | DSE | up |
| 57562 | CEP126 | down |  | 11221 | DUSP10 | up |
| 85459 | CEP295 | down |  | 80824 | DUSP16 | up |
| 23177 | CEP68 | down |  | 1847 | DUSP5 | up |
| 57587 | CFAP97 | down |  | 1850 | DUSP8 | up |
| 1111 | CHEK1 | down |  | 10148 | EBI3 | up |
| 1122 | CHML | down |  | 79180 | EFHD2 | up |
| 51652 | CHMP3 | down |  | 1942 | EFNA1 | up |
| 55501 | CHST12 | down |  | 1956 | EGFR | up |
| 22856 | CHSY1 | down |  | 1958 | EGR1 | up |
| 2342 | CHURC1-FNTB | down |  | 10938 | EHD1 | up |
| 1153 | CIRBP | down |  | 1974 | EIF4A2 | up |
| 25792 | CIZ1 | down |  | 79993 | ELOVL7 | up |
| 11064 | CNTRL | down |  | 24139 | EML2 | up |
| 1355 | COX15 | down |  | 57089 | ENTPD7 | up |
| 1389 | CREBL2 | down |  | 1969 | EPHA2 | up |
| 57325 | CSRP2BP | down |  | 51752 | ERAP1 | up |
| 92070 | CTBP1-AS2 | down |  | 2069 | EREG | up |
| 10217 | CTDSPL | down |  | 23197 | FAF2 | up |
| 5576 | CTU2 | down |  | 83640 | FAM103A1 | up |
| 1523 | CUX1 | down |  | 57613 | FAM234B | up |
| 55280 | CWF19L1 | down |  | 10447 | FAM3C | up |
| 51523 | CXXC5 | down |  | 114907 | FBXO32 | up |
| 80777 | CYB5B | down |  | 26270 | FBXO6 | up |
| 79901 | CYBRD1 | down |  | 2273 | FHL1 | up |
| 54205 | CYCS | down |  | 64778 | FNDC3B | up |
| 23191 | CYFIP1 | down |  | 2353 | FOS | up |
| 50626 | CYHR1 | down |  | 2526 | FUT4 | up |
| 55157 | DARS2 | down |  | 84248 | FYTTD1 | up |
| 54876 | DCAF16 | down |  | 50486 | G0S2 | up |
| 131566 | DCBLD2 | down |  | 652968 | GATSL3 | up |
| 9879 | DDX46 | down |  | 2633 | GBP1 | up |
| 55635 | DEPDC1 | down |  | 2634 | GBP2 | up |
| 1719 | DHFR | down |  | 2635 | GBP3 | up |
| 1734 | DIO2 | down |  | 2643 | GCH1 | up |
| 115752 | DIS3L | down |  | 2669 | GEM | up |
| 22943 | DKK1 | down |  | 2673 | GFPT1 | up |
| 1737 | DLAT | down |  | 9945 | GFPT2 | up |
| 10301 | DLEU1 | down |  | 11010 | GLIPR1 | up |
| 9231 | DLG5 | down |  | 55668 | GPATCH2L | up |
| 8701 | DNAH11 | down |  | 160897 | GPR180 | up |
| 1793 | DOCK1 | down |  | 65983 | GRAMD3 | up |
| 1798 | DPAGT1 | down |  | 23151 | GRAMD4 | up |
| 1810 | DR1 | down |  | 2907 | GRINA | up |
| 51514 | DTL | down |  | 54676 | GTPBP2 | up |
| 22873 | DZIP1 | down |  | 85441 | HELZ2 | up |
| 144455 | E2F7 | down |  | 8337 | HIST2H2AA3 | up |
| 79733 | E2F8 | down |  | 3105 | HLA-A | up |
| 9166 | EBAG9 | down |  | 3107 | HLA-C | up |
| 55862 | ECHDC1 | down |  | 3133 | HLA-E | up |
| 2202 | EFEMP1 | down |  | 3134 | HLA-F | up |
| 1962 | EHHADH | down |  | 6782 | HSPA13 | up |
| 1967 | EIF2B1 | down |  | 3309 | HSPA5 | up |
| 1979 | EIF4EBP2 | down |  | 26353 | HSPB8 | up |
| 8672 | EIF4G3 | down |  | 3383 | ICAM1 | up |
| 255520 | ELMOD2 | down |  | 10561 | IFI44 | up |
| 133418 | EMB | down |  | 10964 | IFI44L | up |
| 10328 | EMC8 | down |  | 2537 | IFI6 | up |
| 27436 | EML4 | down |  | 64135 | IFIH1 | up |
| 2013 | EMP2 | down |  | 3434 | IFIT1 | up |
| 55740 | ENAH | down |  | 3433 | IFIT2 | up |
| 10495 | ENOX2 | down |  | 3475 | IFRD1 | up |
| 54821 | ERCC6L | down |  | 3589 | IL11 | up |
| 114625 | ERMAP | down |  | 3552 | IL1A | up |
| 157570 | ESCO2 | down |  | 3556 | IL1RAP | up |
| 2115 | ETV1 | down |  | 9235 | IL32 | up |
| 23404 | EXOSC2 | down |  | 3566 | IL4R | up |
| 3992 | FADS1 | down |  | 3569 | IL6 | up |
| 63901 | FAM111A | down |  | 3570 | IL6R | up |
| 374393 | FAM111B | down |  | 3656 | IRAK2 | up |
| 10827 | FAM114A2 | down |  | 3659 | IRF1 | up |
| 150864 | FAM117B | down |  | 10379 | IRF9 | up |
| 159090 | FAM122B | down |  | 9636 | ISG15 | up |
| 221061 | FAM171A1 | down |  | 3669 | ISG20 | up |
| 165215 | FAM171B | down |  | 3678 | ITGA5 | up |
| 10712 | FAM189B | down |  | 50618 | ITSN2 | up |
| 285550 | FAM200B | down |  | 25948 | KBTBD2 | up |
| 92002 | FAM58A | down |  | 9314 | KLF4 | up |
| 138311 | FAM69B | down |  | 8609 | KLF7 | up |
| 10262 | FAM71D | down |  | 3866 | KRT15 | up |
| 374986 | FAM73A | down |  | 3914 | LAMB3 | up |
| 9855 | FARP2 | down |  | 7462 | LAT2 | up |
| 26224 | FBXL3 | down |  | 3949 | LDLR | up |
| 23014 | FBXO21 | down |  | 3964 | LGALS8 | up |
| 55612 | FERMT1 | down |  | 3976 | LIF | up |
| 143282 | FGFBP3 | down |  | 200879 | LIPH | up |
| 51661 | FKBP7 | down |  | 3998 | LMAN1 | up |
| 3170 | FOXA2 | down |  | 6648 | LOC100129518 | up |
| 2305 | FOXM1 | down |  | 150094 | LOC102724428 | up |
| 2562 | GABRB3 | down |  | 91694 | LONRF1 | up |
| 51809 | GALNT7 | down |  | 4017 | LOXL2 | up |
| 6936 | GCFC2 | down |  | 4050 | LTB | up |
| 2653 | GCSH | down |  | 286343 | LURAP1L | up |
| 54834 | GDAP2 | down |  | 23764 | MAFF | up |
| 51659 | GINS2 | down |  | 7975 | MAFK | up |
| 9815 | GIT2 | down |  | 81631 | MAP1LC3B | up |
| 51218 | GLRX5 | down |  | 55201 | MAP1S | up |
| 54331 | GNG2 | down |  | 151963 | MB21D2 | up |
| 10007 | GNPDA1 | down |  | 4170 | MCL1 | up |
| 132789 | GNPDA2 | down |  | 79772 | MCTP1 | up |
| 64841 | GNPNAT1 | down |  | 284207 | METRNL | up |
| 51125 | GOLGA7 | down |  | 4277 | MICB | up |
| 55204 | GOLPH3L | down |  | 23515 | MORC3 | up |
| 23171 | GPD1L | down |  | 64419 | MTMR14 | up |
| 493869 | GPX8 | down |  | 4599 | MX1 | up |
| 2926 | GRSF1 | down |  | 4615 | MYD88 | up |
| 2935 | GSPT1 | down |  | 4627 | MYH9 | up |
| 2941 | GSTA4 | down |  | 10135 | NAMPT | up |
| 51512 | GTSE1 | down |  | 135112 | NCOA7 | up |
| 64412 | GZF1 | down |  | 4720 | NDUFS2 | up |
| 94239 | H2AFV | down |  | 4758 | NEU1 | up |
| 9759 | HDAC4 | down |  | 9603 | NFE2L3 | up |
| 28996 | HIPK2 | down |  | 4791 | NFKB2 | up |
| 8364 | HIST1H4C | down |  | 4792 | NFKBIA | up |
| 3141 | HLCS | down |  | 4794 | NFKBIE | up |
| 10363 | HMG20A | down |  | 64332 | NFKBIZ | up |
| 3146 | HMGB1 | down |  | 4864 | NPC1 | up |
| 3149 | HMGB3 | down |  | 4884 | NPTX1 | up |
| 3151 | HMGN2 | down |  | 7376 | NR1H2 | up |
| 9987 | HNRNPDL | down |  | 3164 | NR4A1 | up |
| 3188 | HNRNPH2 | down |  | 4893 | NRAS | up |
| 3209 | HOXA13 | down |  | 4907 | NT5E | up |
| 50809 | HP1BP3 | down |  | 10133 | OPTN | up |
| 3320 | HSP90AA1 | down |  | 9180 | OSMR | up |
| 3308 | HSPA4 | down |  | 78990 | OTUB2 | up |
| 3352 | HTR1D | down |  | 8974 | P4HA2 | up |
| 3454 | IFNAR1 | down |  | 24145 | PANX1 | up |
| 55081 | IFT57 | down |  | 80380 | PDCD1LG2 | up |
| 3588 | IL10RB | down |  | 5154 | PDGFA | up |
| 3572 | IL6ST | down |  | 5210 | PFKFB4 | up |
| 3609 | ILF3 | down |  | 283209 | PGM2L1 | up |
| 196294 | IMMP1L | down |  | 51131 | PHF11 | up |
| 3613 | IMPA2 | down |  | 51105 | PHF20L1 | up |
| 54556 | ING3 | down |  | 7262 | PHLDA2 | up |
| 8821 | INPP4B | down |  | 23035 | PHLPP2 | up |
| 3843 | IPO5 | down |  | 5266 | PI3 | up |
| 7994 | KAT6A | down |  | 415116 | PIM3 | up |
| 56888 | KCMF1 | down |  | 23761 | PISD | up |
| 3756 | KCNH1 | down |  | 8605 | PLA2G4C | up |
| 79047 | KCTD15 | down |  | 5328 | PLAU | up |
| 51780 | KDM3B | down |  | 5329 | PLAUR | up |
| 9768 | KIAA0101 | down |  | 26499 | PLEK2 | up |
| 9665 | KIAA0430 | down |  | 59338 | PLEKHA1 | up |
| 57650 | KIAA1524 | down |  | 123 | PLIN2 | up |
| 57670 | KIAA1549 | down |  | 8613 | PLPP3 | up |
| 80856 | KIAA1715 | down |  | 5359 | PLSCR1 | up |
| 84451 | KIAA1804 | down |  | 57088 | PLSCR4 | up |
| 84542 | KIAA1841 | down |  | 56937 | PMEPA1 | up |
| 158358 | KIAA2026 | down |  | 10105 | PPIF | up |
| 3832 | KIF11 | down |  | 10848 | PPP1R13L | up |
| 9928 | KIF14 | down |  | 84919 | PPP1R15B | up |
| 56992 | KIF15 | down |  | 79660 | PPP1R3B | up |
| 57563 | KLHL8 | down |  | 5519 | PPP2R1B | up |
| 55904 | KMT2E | down |  | 5743 | PTGS2 | up |
| 51315 | KRCC1 | down |  | 5744 | PTHLH | up |
| 144501 | KRT80 | down |  | 5794 | PTPRH | up |
| 3927 | LASP1 | down |  | 5819 | PVRL2 | up |
| 81606 | LBH | down |  | 9367 | RAB9A | up |
| 253558 | LCLAT1 | down |  | 80328 | RAET1L | up |
| 11019 | LIAS | down |  | 644943 | RASSF10 | up |
| 22998 | LIMCH1 | down |  | 5971 | RELB | up |
| 84823 | LMNB2 | down |  | 388 | RHOB | up |
| 348801 | LNP1 | down |  | 6016 | RIT1 | up |
| 6167 | LOC100506548 | down |  | 6041 | RNASEL | up |
| 9554 | LOC100996517 | down |  | 255488 | RNF144B | up |
| 157378 | LOC286052 | down |  | 57674 | RNF213 | up |
| 9926 | LPGAT1 | down |  | 84870 | RSPO3 | up |
| 4026 | LPP | down |  | 9711 | RUBCN | up |
| 122769 | LRR1 | down |  | 6303 | SAT1 | up |
| 23507 | LRRC8B | down |  | 677681 | SCARNA20 | up |
| 23658 | LSM5 | down |  | 6385 | SDC4 | up |
| 90624 | LYRM7 | down |  | 6386 | SDCBP | up |
| 9794 | MAML1 | down |  | 10802 | SEC24A | up |
| 4215 | MAP3K3 | down |  | 10509 | SEMA4B | up |
| 11183 | MAP4K5 | down |  | 1992 | SERPINB1 | up |
| 22919 | MAPRE1 | down |  | 5271 | SERPINB8 | up |
| 23139 | MAST2 | down |  | 2810 | SFN | up |
| 53615 | MBD3 | down |  | 6446 | SGK1 | up |
| 129642 | MBOAT2 | down |  | 30011 | SH3KBP1 | up |
| 4171 | MCM2 | down |  | 9123 | SLC16A3 | up |
| 4175 | MCM6 | down |  | 26503 | SLC17A5 | up |
| 84515 | MCM8 | down |  | 51312 | SLC25A37 | up |
| 254394 | MCM9 | down |  | 6515 | SLC2A14 | up |
| 9656 | MDC1 | down |  | 11182 | SLC2A6 | up |
| 29969 | MDFIC | down |  | 11046 | SLC35D2 | up |
| 399818 | METTL10 | down |  | 80723 | SLC35G2 | up |
| 51108 | METTL9 | down |  | 54407 | SLC38A2 | up |
| 57534 | MIB1 | down |  | 84102 | SLC41A2 | up |
| 55320 | MIS18BP1 | down |  | 6533 | SLC6A6 | up |
| 4288 | MKI67 | down |  | 28231 | SLCO4A1 | up |
| 57496 | MKL2 | down |  | 64750 | SMURF2 | up |
| 4298 | MLLT1 | down |  | 8651 | SOCS1 | up |
| 22877 | MLXIP | down |  | 6672 | SP100 | up |
| 55329 | MNS1 | down |  | 6678 | SPARC | up |
| 55233 | MOB1A | down |  | 81848 | SPRY4 | up |
| 10198 | MPHOSPH9 | down |  | 58472 | SQRDL | up |
| 4361 | MRE11A | down |  | 8878 | SQSTM1 | up |
| 9801 | MRPL19 | down |  | 5552 | SRGN | up |
| 122704 | MRPL52 | down |  | 6744 | SSFA2 | up |
| 60488 | MRPS35 | down |  | 6772 | STAT1 | up |
| 23787 | MTCH1 | down |  | 6776 | STAT5A | up |
| 80298 | MTERF2 | down |  | 6781 | STC1 | up |
| 8898 | MTMR2 | down |  | 8614 | STC2 | up |
| 55149 | MTPAP | down |  | 50861 | STMN3 | up |
| 150678 | MYEOV2 | down |  | 23673 | STX12 | up |
| 4651 | MYO10 | down |  | 6890 | TAP1 | up |
| 4644 | MYO5A | down |  | 6891 | TAP2 | up |
| 440145 | MZT1 | down |  | 83874 | TBC1D10A | up |
| 79035 | NABP2 | down |  | 23424 | TDRD7 | up |
| 133686 | NADK2 | down |  | 7980 | TFPI2 | up |
| 4677 | NARS | down |  | 7056 | THBD | up |
| 23397 | NCAPH | down |  | 79875 | THSD4 | up |
| 9612 | NCOR2 | down |  | 57707 | TLDC1 | up |
| 54820 | NDE1 | down |  | 7098 | TLR3 | up |
| 4781 | NFIB | down |  | 64114 | TMBIM1 | up |
| 57185 | NIPAL3 | down |  | 51014 | TMED7 | up |
| 25836 | NIPBL | down |  | 23670 | TMEM2 | up |
| 4828 | NMB | down |  | 23731 | TMEM245 | up |
| 4836 | NMT1 | down |  | 100862671 | TMEM265 | up |
| 10874 | NMU | down |  | 55254 | TMEM39A | up |
| 79159 | NOL12 | down |  | 7124 | TNF | up |
| 11270 | NRM | down |  | 7126 | TNFAIP1 | up |
| 25936 | NSL1 | down |  | 7128 | TNFAIP3 | up |
| 221294 | NT5DC1 | down |  | 25816 | TNFAIP8 | up |
| 10762 | NUP50 | down |  | 8795 | TNFRSF10B | up |
| 51203 | NUSAP1 | down |  | 51330 | TNFRSF12A | up |
| 29789 | OLA1 | down |  | 7133 | TNFRSF1B | up |
| 23594 | ORC6 | down |  | 3604 | TNFRSF9 | up |
| 55644 | OSGEP | down |  | 10318 | TNIP1 | up |
| 64172 | OSGEPL1 | down |  | 127262 | TPRG1L | up |
| 53354 | PANK1 | down |  | 28517 | TRAC | up |
| 10914 | PAPOLA | down |  | 7185 | TRAF1 | up |
| 5101 | PCDH9 | down |  | 10221 | TRIB1 | up |
| 5134 | PDCD2 | down |  | 6737 | TRIM21 | up |
| 27250 | PDCD4 | down |  | 53840 | TRIM34 | up |
| 5140 | PDE3B | down |  | 205860 | TRIML2 | up |
| 5144 | PDE4D | down |  | 9819 | TSC22D2 | up |
| 27115 | PDE7B | down |  | 65264 | UBE2Z | up |
| 51248 | PDZD11 | down |  | 80328 | ULBP2 | up |
| 118987 | PDZD8 | down |  | 54532 | USP53 | up |
| 79834 | PEAK1 | down |  | 7424 | VEGFC | up |
| 9489 | PGS1 | down |  | 7436 | VLDLR | up |
| 26147 | PHF19 | down |  | 51231 | VRK3 | up |
| 10401 | PIAS3 | down |  | 23558 | WBP2 | up |
| 10026 | PIGK | down |  | 55432 | YOD1 | up |
| 94005 | PIGS | down |  | 9925 | ZBTB5 | up |
| 8396 | PIP4K2B | down |  | 80149 | ZC3H12A | up |
| 5332 | PLCB4 | down |  | 85463 | ZC3H12C | up |
| 5378 | PMS1 | down |  | 7538 | ZFP36 | up |
| 10687 | PNMA2 | down |  | 90874 | ZNF697 | up |
| 5422 | POLA1 | down |  |  |  |  |
| 10714 | POLD3 | down |  |  |  |  |
| 54107 | POLE3 | down |  |  |  |  |
| 51082 | POLR1D | down |  |  |  |  |
| 10621 | POLR3F | down |  |  |  |  |
| 9883 | POM121 | down |  |  |  |  |
| 55624 | POMGNT1 | down |  |  |  |  |
| 29954 | POMT2 | down |  |  |  |  |
| 22932 | POMZP3 | down |  |  |  |  |
| 79144 | PPDPF | down |  |  |  |  |
| 90673 | PPP1R3E | down |  |  |  |  |
| 5532 | PPP3CB | down |  |  |  |  |
| 5537 | PPP6C | down |  |  |  |  |
| 51012 | PRELID3B | down |  |  |  |  |
| 9581 | PREPL | down |  |  |  |  |
| 5576 | PRKAR2A | down |  |  |  |  |
| 5577 | PRKAR2B | down |  |  |  |  |
| 80209 | PROSER1 | down |  |  |  |  |
| 55771 | PRR11 | down |  |  |  |  |
| 23215 | PRRC2C | down |  |  |  |  |
| 58497 | PRUNE | down |  |  |  |  |
| 5684 | PSMA3 | down |  |  |  |  |
| 5813 | PURA | down |  |  |  |  |
| 54899 | PXK | down |  |  |  |  |
| 23518 | R3HDM1 | down |  |  |  |  |
| 376267 | RAB15 | down |  |  |  |  |
| 9364 | RAB28 | down |  |  |  |  |
| 51762 | RAB8B | down |  |  |  |  |
| 5903 | RANBP2 | down |  |  |  |  |
| 5908 | RAP1B | down |  |  |  |  |
| 51735 | RAPGEF6 | down |  |  |  |  |
| 10137 | RBM12 | down |  |  |  |  |
| 5939 | RBMS2 | down |  |  |  |  |
| 149041 | RC3H1 | down |  |  |  |  |
| 64864 | RFX7 | down |  |  |  |  |
| 5994 | RFXAP | down |  |  |  |  |
| 83695 | RHNO1 | down |  |  |  |  |
| 23433 | RHOQ | down |  |  |  |  |
| 84934 | RITA1 | down |  |  |  |  |
| 51444 | RNF138 | down |  |  |  |  |
| 50862 | RNF141 | down |  |  |  |  |
| 79871 | RPAP2 | down |  |  |  |  |
| 79657 | RPAP3 | down |  |  |  |  |
| 6165 | RPL35A | down |  |  |  |  |
| 56658 | RPP21 | down |  |  |  |  |
| 23248 | RPRD2 | down |  |  |  |  |
| 6209 | RPS15 | down |  |  |  |  |
| 6228 | RPS23 | down |  |  |  |  |
| 51018 | RRP15 | down |  |  |  |  |
| 23076 | RRP1B | down |  |  |  |  |
| 26156 | RSL1D1 | down |  |  |  |  |
| 23168 | RTF1 | down |  |  |  |  |
| 201965 | RWDD4 | down |  |  |  |  |
| 22908 | SACM1L | down |  |  |  |  |
| 54581 | SCAND2P | down |  |  |  |  |
| 152579 | SCFD2 | down |  |  |  |  |
| 6382 | SDC1 | down |  |  |  |  |
| 7095 | SEC62 | down |  |  |  |  |
| 11231 | SEC63 | down |  |  |  |  |
| 26168 | SENP3 | down |  |  |  |  |
| 22929 | SEPHS1 | down |  |  |  |  |
| 871 | SERPINH1 | down |  |  |  |  |
| 6418 | SET | down |  |  |  |  |
| 133383 | SETD9 | down |  |  |  |  |
| 7536 | SF1 | down |  |  |  |  |
| 10262 | SF3B4 | down |  |  |  |  |
| 118980 | SFXN2 | down |  |  |  |  |
| 81855 | SFXN3 | down |  |  |  |  |
| 152503 | SH3D19 | down |  |  |  |  |
| 6470 | SHMT1 | down |  |  |  |  |
| 23235 | SIK2 | down |  |  |  |  |
| 51804 | SIX4 | down |  |  |  |  |
| 221150 | SKA3 | down |  |  |  |  |
| 7884 | SLBP | down |  |  |  |  |
| 6558 | SLC12A2 | down |  |  |  |  |
| 6509 | SLC1A4 | down |  |  |  |  |
| 6510 | SLC1A5 | down |  |  |  |  |
| 84275 | SLC25A33 | down |  |  |  |  |
| 79939 | SLC35E1 | down |  |  |  |  |
| 23446 | SLC44A1 | down |  |  |  |  |
| 6541 | SLC7A1 | down |  |  |  |  |
| 55719 | SLF2 | down |  |  |  |  |
| 4090 | SMAD5 | down |  |  |  |  |
| 60682 | SMAP1 | down |  |  |  |  |
| 6601 | SMARCC2 | down |  |  |  |  |
| 10592 | SMC2 | down |  |  |  |  |
| 56935 | SMCO4 | down |  |  |  |  |
| 54065 | SMIM11A | down |  |  |  |  |
| 10302 | SNAPC5 | down |  |  |  |  |
| 84973 | SNHG7 | down |  |  |  |  |
| 6632 | SNRPD1 | down |  |  |  |  |
| 112574 | SNX18 | down |  |  |  |  |
| 28966 | SNX24 | down |  |  |  |  |
| 6654 | SOS1 | down |  |  |  |  |
| 147841 | SPC24 | down |  |  |  |  |
| 10847 | SRCAP | down |  |  |  |  |
| 10929 | SRSF8 | down |  |  |  |  |
| 23648 | SSBP3 | down |  |  |  |  |
| 10274 | STAG1 | down |  |  |  |  |
| 27067 | STAU2 | down |  |  |  |  |
| 51765 | STK26 | down |  |  |  |  |
| 23012 | STK38L | down |  |  |  |  |
| 10923 | SUB1 | down |  |  |  |  |
| 25870 | SUMF2 | down |  |  |  |  |
| 11198 | SUPT16H | down |  |  |  |  |
| 55578 | SUPT20H | down |  |  |  |  |
| 79723 | SUV39H2 | down |  |  |  |  |
| 258010 | SVIP | down |  |  |  |  |
| 23075 | SWAP70 | down |  |  |  |  |
| 23224 | SYNE2 | down |  |  |  |  |
| 6878 | TAF6 | down |  |  |  |  |
| 54662 | TBC1D13 | down |  |  |  |  |
| 93627 | TBCK | down |  |  |  |  |
| 84897 | TBRG1 | down |  |  |  |  |
| 9747 | TCAF1 | down |  |  |  |  |
| 285343 | TCAIM | down |  |  |  |  |
| 10915 | TCERG1 | down |  |  |  |  |
| 6941 | TCF19 | down |  |  |  |  |
| 6949 | TCOF1 | down |  |  |  |  |
| 6950 | TCP1 | down |  |  |  |  |
| 7049 | TGFBR3 | down |  |  |  |  |
| 9392 | TGFBRAP1 | down |  |  |  |  |
| 80764 | THAP7 | down |  |  |  |  |
| 7057 | THBS1 | down |  |  |  |  |
| 90381 | TICRR | down |  |  |  |  |
| 7090 | TLE3 | down |  |  |  |  |
| 7094 | TLN1 | down |  |  |  |  |
| 114908 | TMEM123 | down |  |  |  |  |
| 153339 | TMEM167A | down |  |  |  |  |
| 79134 | TMEM185B | down |  |  |  |  |
| 51259 | TMEM216 | down |  |  |  |  |
| 90488 | TMEM263 | down |  |  |  |  |
| 148534 | TMEM56 | down |  |  |  |  |
| 27346 | TMEM97 | down |  |  |  |  |
| 7112 | TMPO | down |  |  |  |  |
| 112858 | TP53RK | down |  |  |  |  |
| 286827 | TRIM59 | down |  |  |  |  |
| 9319 | TRIP13 | down |  |  |  |  |
| 7249 | TSC2 | down |  |  |  |  |
| 7247 | TSN | down |  |  |  |  |
| 23331 | TTC28 | down |  |  |  |  |
| 23093 | TTLL5 | down |  |  |  |  |
| 7275 | TUB | down |  |  |  |  |
| 51174 | TUBD1 | down |  |  |  |  |
| 11334 | TUSC2 | down |  |  |  |  |
| 55833 | UBAP2 | down |  |  |  |  |
| 140739 | UBE2F | down |  |  |  |  |
| 7332 | UBE2L3 | down |  |  |  |  |
| 7374 | UNG | down |  |  |  |  |
| 790955 | UQCC3 | down |  |  |  |  |
| 51118 | UTP11L | down |  |  |  |  |
| 55187 | VPS13D | down |  |  |  |  |
| 9559 | VPS26A | down |  |  |  |  |

| 51699 | VPS29 | down |  |  |  |  |
| --- | --- | --- | --- | --- | --- | --- |
| 8936 | WASF1 | down |  |  |  |  |
| 11169 | WDHD1 | down |  |  |  |  |
| 89891 | WDR34 | down |  |  |  |  |
| 54904 | WHSC1L1 | down |  |  |  |  |
| 7456 | WIPF1 | down |  |  |  |  |
| 147179 | WIPF2 | down |  |  |  |  |
| 91419 | XRCC6BP1 | down |  |  |  |  |
| 152002 | XXYLT1 | down |  |  |  |  |
| 54915 | YTHDF1 | down |  |  |  |  |
| 51776 | ZAK | down |  |  |  |  |
| 84327 | ZBED3 | down |  |  |  |  |
| 57621 | ZBTB2 | down |  |  |  |  |
| 79882 | ZC3H14 | down |  |  |  |  |
| 23211 | ZC3H4 | down |  |  |  |  |
| 7763 | ZFAND5 | down |  |  |  |  |
| 7586 | ZKSCAN1 | down |  |  |  |  |
| 9202 | ZMYM4 | down |  |  |  |  |
| 7707 | ZNF148 | down |  |  |  |  |
| 7733 | ZNF180 | down |  |  |  |  |
| 10778 | ZNF271P | down |  |  |  |  |
| 55609 | ZNF280C | down |  |  |  |  |
| 149076 | ZNF362 | down |  |  |  |  |
| 171017 | ZNF384 | down |  |  |  |  |
| 147657 | ZNF480 | down |  |  |  |  |
| 22847 | ZNF507 | down |  |  |  |  |
| 55205 | ZNF532 | down |  |  |  |  |
| 80110 | ZNF614 | down |  |  |  |  |
| 285989 | ZNF789 | down |  |  |  |  |
| 152485 | ZNF827 | down |  |  |  |  |
| 80345 | ZSCAN16 | down |  |  |  |  |
| 55055 | ZWILCH | down |  |  |  |  |

**Supplementary Figure 1.** The prognostic value of the expression levels of HIPPI in LUAD patients from TCGA.


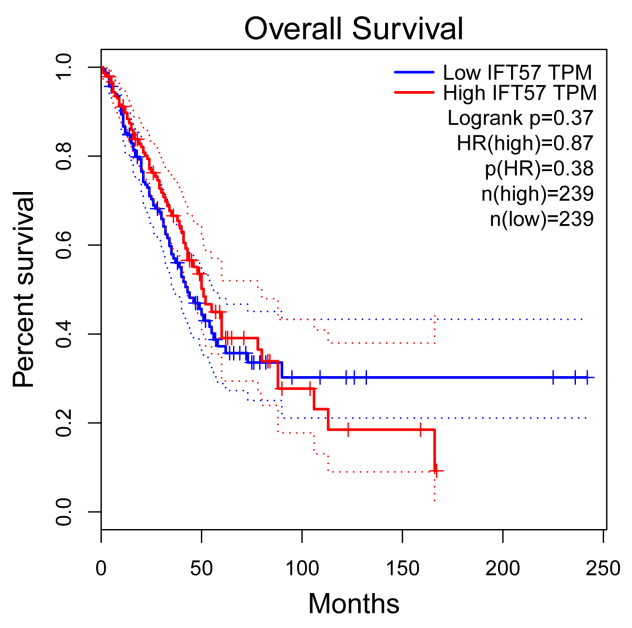

Supplement: Supplementary file 1 [file get_supplementary_file.php]
